# Supplementary material for: Genetic Association of <em>UMOD</em> Gene Variant (16:20353266A>G) and Bioinformatics Analyses of the Uromodulin Protein in CKD Patients of Pakistani Origin
Source: Preprints.org preprint supplement (doi:10.20944/preprints202308.1446.v1), 2023-08-22
Supplement: Supplementary file 3 [file supplementary]

**Supplementary Table 1:** Collected samples details

| **Sample ID** | **Age/Gender** | **Test type**  **Performed** | **(mmol/L)/**  **(mg/dL)** |
| --- | --- | --- | --- |
| 1 | 35/M | Urea | 144 |
| Creatinine | 9.1 |
| 2 | 56/M | Urea | 169 |
| Creatinine | 15.9 |
| 3 | 36/F | Urea | 139 |
| Creatinine | 7.0 |
| 4 | 30/F | Urea | 140 |
| Creatinine | 8.0 |
| 5 | 64/M | Urea | 113 |
| Creatinine | 6.1 |
| 6 | 35/M | Urea | 217 |
| Creatinine | 10.2 |
| 7 | 58/F | Urea | 106 |
| Creatinine | 4.5 |
| 8 | 65/F | Urea | 100 |
| Creatinine | 6.4 |
| 9 | 65/F | Urea | 150 |
| Creatinine | 6.5 |
| 10 | 60/F | urea | 108 |
| Creatinine | 2.5 |
| 11 | 42/F | Urea | 80 |
| Creatinine | 3.2 |
| 12 | 45/M | Urea | 105 |
| Creatinine | 8.7 |
| 13 | 40/F | Urea | 75 |
| Creatinine | 5.1 |
| 14 | 42/M | Urea | 128 |
| Creatinine | 9.8 |
| 15 | 45/M | Urea | 124 |
| Creatinine | 9 |
| 16 | 30/M | urea | 79 |
| Creatine | 6.6 |
| 17 | 40/M | Urea | 105 |
| Creatinine | 5.8 |
| 18 | 55/F | Urea | 86 |
| Creatinine | 6.8 |
| 19 | 43/F | Urea | 82 |
| Creatinine | 6.7 |
| 20 | 50/M | Urea | 97 |
| Creatinine | 5.6 |
| 21 | 54/M | Urea | 117 |
| Creatinine | 7.8 |
| 22 | 43/F | Urea | 111 |
| Creatinine | 7.5 |
| 23 | 60/M | Urea | 168 |
| Creatinine | 12.8 |
| 24 | 36/F | Urea | 80 |
| Creatine | 5.9 |
| 25 | 52/M | urea | 97 |
| creatinine | 10.2 |
| 26 | 53/M | Urea | 159 |
| Creatinine | 12.3 |
| 27 | 55/M | Urea | 102 |
| Creatinine | 8.3 |
| 28 | 43/F | Urea | 167 |
| Creatinine | 10.4 |
| 29 | 24/F | Urea | 159 |
| Creatinine | 11.0 |
| 30 | 34/M | Urea | 101 |
| Creatinine | 12.9 |
| 31 | 37/F | Urea | 159 |
| Creatinine | 10.9 |
| 32 | 46/F | Urea | 120 |
| Creatinine | 10.8 |
| 33 | 50/M | Urea | 181 |
| Creatinine | 10.1 |
| 34 | 50/F | Urea | 67 |
| Creatinine | 9.3 |
| 35 | 62/M | Urea | 110 |
| Creatinine | 11.7 |
| 36 | 60/M | Urea | 122 |
| Creatinine | 7.6 |
| 37 | 65/F | Urea  Creatinine | 197  6.9 |
| 38 | 32/M | Urea | 89 |
| Creatinine | 4.3 |
| 39 | 40/F | Urea | 101 |
| Creatinine | 12.1 |
| 40 | 33/M | Urea | 72 |
| Creatinine | 12.9 |
| 41 | 35/M | Urea | 105 |
| Creatinine | 13.8 |
| 42 | 19/M | Urea | 73 |
| Creatinine | 7.3 |
| 43 | 55/M | Urea | 81 |
| Creatinine | 8.4 |
| 44 | 66/M | Urea | 71 |
| Creatinine | 6.5 |
| 45 | 30/M | Urea | 146 |
| Creatinine | 10.8 |
| 46 | 32/M | Urea | 134 |
| Creatinine | 9.3 |
| 47 | 21/M | Urea | 77 |
| Creatinine | 7.2 |
| 48 | 62/F | Urea | 56 |
| Creatinine | 5.0 |
| 49 | 23/F | Urea | 69 |
| Creatinine | 6.3 |
| 50 | 39/F | Urea | 94 |
| Creatinine | 6.0 |
